# Supplementary material for: A Preliminary Study of Chemical Profiles of Honey, Cerumen, and Propolis of the African Stingless Bee Meliponula ferruginea
Source: MDPI journal article supplement (doi:10.3390/foods10050997), 2021-05-02
Supplement: s1 [file s1]

**Table S2.** Quantities of honey components (in g/100g) in *M. ferruginea* honey (TZ\_1), *M. ferruginea* honey after 18 months' storage (TZ\_18) and Bulgarian honey samples (BG\_P1 – BG\_P5, BG\_M1 – BG\_M5).

| Compound,<br>g/100g    | <sup>13</sup> C<br>NMR<br>chemical<br>shift (δ),<br>ppm | TZ_1  | TZ_18 | Average<br>(TZ) | Average<br>(BG) | BG_P1 | BG_P2 | BG_P3 | BG_P4 | BG_P5 | BG_M1 | BG_M2 | BG_M3 | BG_M4 | BG_M5 | Average<br>(BG_P) | Average<br>(BG_M) |
|------------------------|---------------------------------------------------------|-------|-------|-----------------|-----------------|-------|-------|-------|-------|-------|-------|-------|-------|-------|-------|-------------------|-------------------|
| <b>Monosaccharides</b> |                                                         |       |       |                 |                 |       |       |       |       |       |       |       |       |       |       |                   |                   |
| <b>F</b>               | 67.5                                                    | 26.85 | 27.69 | 27.27           | 36.87           | 35.08 | 42.23 | 37.19 | 37.45 | 38.64 | 35.43 | 35.64 | 36.64 | 35.81 | 34.59 | 38.12             | 35.62             |
| <b>G</b>               | 74.1                                                    | 12.76 | 12.29 | 12.53           | 31.70           | 32.85 | 27.67 | 32.35 | 32.43 | 31.86 | 32.85 | 31.91 | 30.59 | 31.34 | 33.17 | 31.43             | 31.97             |
| <b>Disaccharides</b>   |                                                         |       |       |                 |                 |       |       |       |       |       |       |       |       |       |       |                   |                   |
| <b>Gb</b>              | 102.5                                                   | 0.00  | 0.00  | 0.00            | 0.05            | 0.13  | 0.00  | 0.00  | 0.00  | 0.00  | 0.00  | 0.15  | 0.00  | 0.17  | 0.00  | 0.03              | 0.06              |
| <b>IMa</b>             | 97.7                                                    | 1.22  | 2.69  | 1.96            | 1.07            | 0.83  | 0.76  | 0.86  | 0.86  | 1.22  | 1.26  | 1.16  | 0.83  | 1.36  | 1.54  | 0.91              | 1.23              |
| <b>IMu</b>             | 104.7                                                   | 1.24  | 1.59  | 1.42            | 0.12            | 0.00  | 0.00  | 0.00  | 0.00  | 0.00  | 0.00  | 0.00  | 0.43  | 0.32  | 0.46  | 0.00              | 0.24              |
| <b>Kb</b>              | 89.3                                                    | 0.30  | 0.42  | 0.36            | 0.79            | 0.75  | 0.64  | 0.82  | 0.81  | 0.91  | 0.76  | 0.87  | 0.85  | 0.93  | 0.53  | 0.79              | 0.79              |
| <b>Lu</b>              | 100.1                                                   | 0.46  | 0.51  | 0.49            | 0.14            | 0.09  | 0.11  | 0.09  | 0.09  | 0.11  | 0.17  | 0.15  | 0.15  | 0.19  | 0.21  | 0.10              | 0.17              |
| <b>Ma</b>              | 99.5                                                    | 1.56  | 1.97  | 1.77            | 0.93            | 1.72  | 1.17  | 1.23  | 1.44  | 0.28  | 0.75  | 1.03  | 0.65  | 0.57  | 0.48  | 1.17              | 0.70              |
| <b>Mu</b>              | 100.3                                                   | 1.27  | 1.63  | 1.45            | 1.32            | 1.15  | 1.17  | 1.00  | 1.17  | 1.28  | 1.39  | 1.35  | 1.48  | 1.34  | 1.86  | 1.15              | 1.48              |
| <b>Ng</b>              | 98.8                                                    | 0.64  | 0.59  | 0.62            | 0.46            | 0.40  | 0.41  | 0.49  | 0.42  | 0.56  | 0.41  | 0.52  | 0.55  | 0.46  | 0.37  | 0.46              | 0.46              |
| <b>Su</b>              | 76.4                                                    | 0.62  | 0.29  | 0.46            | 0.27            | 0.45  | 0.23  | 0.25  | 0.23  | 0.19  | 0.14  | 0.18  | 0.69  | 0.18  | 0.14  | 0.27              | 0.27              |
| <b>Tru</b>             | 97.7                                                    | 20.87 | 20.62 | 20.75           | 1.06            | 0.81  | 0.90  | 0.80  | 0.86  | 1.01  | 1.22  | 0.98  | 1.27  | 1.19  | 1.55  | 0.88              | 1.24              |
| <b>Tu</b>              | 100.7                                                   | 3.52  | 2.66  | 3.09            | 1.75            | 1.97  | 1.98  | 1.64  | 1.80  | 1.58  | 1.81  | 1.90  | 1.49  | 1.92  | 1.40  | 1.79              | 1.70              |
| <b>ααTr</b>            | 93.0                                                    | 0.00  | 0.12  | 0.06            | 0.04            | 0.05  | 0.00  | 0.00  | 0.00  | 0.00  | 0.00  | 0.05  | 0.10  | 0.06  | 0.12  | 0.01              | 0.07              |
| <b>αβTr</b>            | 102.7                                                   | 0.35  | 0.29  | 0.32            | 0.28            | 0.25  | 0.26  | 0.26  | 0.29  | 0.29  | 0.26  | 0.35  | 0.33  | 0.34  | 0.21  | 0.27              | 0.30              |
| <b>Trisaccharides</b>  |                                                         |       |       |                 |                 |       |       |       |       |       |       |       |       |       |       |                   |                   |
| <b>Er</b>              | 99.6                                                    | 0.74  | 0.17  | 0.46            | 0.45            | 1.10  | 0.74  | 0.97  | 0.39  | 0.26  | 0.28  | 0.23  | 0.20  | 0.24  | 0.06  | 0.69              | 0.20              |
| <b>1-Ks</b>            | 92.3                                                    | 0.00  | 0.00  | 0.00            | 0.22            | 0.12  | 0.00  | 0.20  | 0.00  | 0.00  | 0.25  | 0.31  | 0.49  | 0.34  | 0.44  | 0.06              | 0.37              |
| <b>Mr</b>              | 99.3                                                    | 0.00  | 0.00  | 0.00            | 0.05            | 0.00  | 0.00  | 0.00  | 0.00  | 0.00  | 0.00  | 0.23  | 0.21  | 0.00  | 0.03  | 0.00              | 0.09              |
| <b>Mz</b>              | 91.5                                                    | 0.22  | 0.12  | 0.17            | 0.05            | 0.07  | 0.00  | 0.00  | 0.00  | 0.00  | 0.12  | 0.08  | 0.03  | 0.21  | 0.00  | 0.01              | 0.09              |

|                        |      |      |      |      |      |      |      |      |      |      |      |      |      |      |      |      |      |
|------------------------|------|------|------|------|------|------|------|------|------|------|------|------|------|------|------|------|------|
| <b>Pa</b>              | 99.6 | 0.52 | 0.43 | 0.48 | 0.26 | 0.58 | 0.24 | 0.24 | 0.20 | 0.27 | 0.23 | 0.27 | 0.25 | 0.25 | 0.08 | 0.31 | 0.22 |
| <b>Rf</b>              | 76.2 | 0.65 | 0.49 | 0.57 | 0.30 | 0.27 | 0.20 | 0.26 | 0.23 | 0.25 | 0.33 | 0.33 | 0.34 | 0.33 | 0.42 | 0.24 | 0.35 |
| <b>Other compounds</b> |      |      |      |      |      |      |      |      |      |      |      |      |      |      |      |      |      |
| <b>Q</b>               | 33.3 | 0.00 | 0.00 | 0.00 | 0.15 | 0.00 | 0.00 | 0.00 | 0.00 | 0.00 | 0.28 | 0.23 | 0.31 | 0.36 | 0.31 | 0.00 | 0.30 |
| <b>U</b>               | -    | 5.98 | 5.26 | 5.62 | 1.60 | 1.29 | 1.27 | 1.27 | 1.26 | 1.24 | 1.97 | 1.89 | 1.97 | 1.96 | 1.90 | 1.27 | 1.94 |

Acronyms: F – Fructose; G – Glucose; Gb – Gentiobiose; IMa – Isomaltose; IMu – Isomaltulose; Kb – Kojibiose; Lu – Leucrose; Ma – Maltose; Mu – Maltulose; Ng – Nigerose; Su – Sucrose; Tru – Trehalulose; Tu – Turanose;  $\alpha\alpha$ Tr –  $\alpha\alpha$ Trehalose;  $\alpha\beta$ Tr –  $\alpha\beta$ Trehalose; Er – Erlose; 1-Ks – 1-Kestose; Mr – Maltotriose; Mz – Melezitose; Pa – Panose; Rf – Raffinose; Q – Quercitol; U – Unknowns (sum of 15 unidentified compounds with signals at  $\delta$  104.1 ppm (U1), 103.7 ppm (U2), 103.6 ppm (U3), 103.5 ppm (U4), 103.4 ppm (U5), 103.3 ppm (U6), 102.9 ppm (U7), 102.3 ppm (U8), 101.7 ppm (U9), 101.2 ppm (U10), 100.7 ppm (U11), 98.1 ppm (U12), 97.8 ppm (U13), 96.7 ppm (U14), 12.0 ppm (U15)).
