# Supplementary material for: A Preliminary Study of Chemical Profiles of Honey, Cerumen, and Propolis of the African Stingless Bee Meliponula ferruginea
Source: MDPI journal article supplement (doi:10.3390/foods10050997), 2021-05-02
Supplement: s1 [file s1]

Table S1. Bulgarian honey samples

| <b>Sample</b> | <b>Supplier</b> | <b>Geographical origin</b> | <b>Botanical origin</b> | <b>Entomological origin</b> |
|---------------|-----------------|----------------------------|-------------------------|-----------------------------|
| BG_P1         | beekeeper       | Ihtiman                    | polyfloral              | Apis mellifera              |
| BG_P2         | beekeeper       | Saedinenie,<br>Plovdiv     | polyfloral              | Apis mellifera              |
| BG_P3         | commercial      | *                          | polyfloral              | Apis mellifera              |
| BG_P4         | beekeeper       | Vratsa                     | polyfloral              | Apis mellifera              |
| BG_P5         | beekeeper       | Asenovgrad                 | polyfloral              | Apis mellifera              |
| BG_M1         | commercial      | Stolnik, Sofia             | honeydew                | Apis mellifera              |
| BG_M2         | beekeeper       | Kosharevo,<br>Pernik       | honeydew                | Apis mellifera              |
| BG_M3         | beekeeper       | Dobrich<br>Province        | honeydew                | Apis mellifera              |
| BG_M4         | beekeeper       | Sandanski                  | honeydew                | Apis mellifera              |
| BG_M5         | beekeeper       | Strandzha                  | honeydew                | Apis mellifera              |
