# Supplementary material for: A Preliminary Study of Chemical Profiles of Honey, Cerumen, and Propolis of the African Stingless Bee Meliponula ferruginea
Source: MDPI journal article supplement (doi:10.3390/foods10050997), 2021-05-02
Supplement: s1 [file s1]

**Table S3.** Chemical composition of propolis and cerumen extracts (GC–MS; % of TIC<sup>a</sup>).

| Compound                                    | KC1-1          | KC1-2 | KC2-1 | KC2-2 |
|---------------------------------------------|----------------|-------|-------|-------|
| Sugars (mono- and disaccharides)            | 15.6           | 9.1   | 35.1  | 54.1  |
| Arabitol                                    | – <sup>b</sup> | –     | 24.7  | 1.0   |
| Mannitol                                    | 1.6            | –     | 3.8   | 2.6   |
| <i>p</i> -Hydroxybenzoic acid               | –              | –     | 0.2   | –     |
| Vanillic acid                               | –              | 0.7   | –     | –     |
| <i>p</i> -Coumaric acid                     | –              | 0.6   | –     | –     |
| Caffeic acid                                | –              | 0.5   | –     | –     |
| Quinic acid                                 | 0.4            | 15.5  | 1.2   | 2.1   |
| Hexadecanoic acid                           | 0.3            | 1.2   | 1.3   | 0.2   |
| Hexadecenoic acid                           | –              | 0.2   | –     | –     |
| Oleic acid                                  | 1.7            | 2.0   | 1.0   | 0.7   |
| Linoleic acid                               | –              | 0.9   | –     | –     |
| Eicosanoic acid                             | –              | 0.3   | 1.3   | –     |
| Diterpenic acid<br>pimaric type             | 1.3            | –     | –     | –     |
| 13- <i>epi</i> -Toruloso                    | 0.8            | –     | –     | 0.6   |
| Diterpenic acid<br>pimaric type<br>(isomer) | 8.8            | –     | –     | 2.0   |
| Hydroxy<br>abietadiene                      | 2.1            | –     | –     |       |
| Isopimaric acid                             | –              | –     | –     | 0.2   |
| Communic acid                               | 1.0            | –     | –     | Tr.   |
| 13- <i>epi</i> -Cupressic<br>acid           | 3.6            | –     | –     | 1.7   |

|                                                                           |       |                  |   |     |
|---------------------------------------------------------------------------|-------|------------------|---|-----|
| Imbricataloic acid                                                        | 30.79 | -                | - | 5.4 |
| Abietic acid                                                              | 7.3   | -                | - | 1.5 |
| Dehydroabietic acid                                                       | 0.1   | -                | - | 0.5 |
| Acetylisocupressic acid                                                   | 4.8   | -                | - | Tr. |
| Unknown M <sup>+</sup> = 570<br>(major peaks m/z 453, 439, 218, 147, 129) | 3.9   | -                | - | -   |
| Unknown M <sup>+</sup> = 568<br>(major peaks m/z 451, 437, 218, 147, 129) | 8.0   | -                | - | -   |
| Resorcinol C15:0                                                          | -     | 0.3              | - | -   |
| Resorcinol C15:1                                                          | -     | 0.3              | - | -   |
| Cardanol C17:1                                                            | -     | 0.1              | - | --  |
| Resorcinol C17:0                                                          | -     | 0.4              | - | -   |
| Resorcinol C17:1                                                          | -     | 0.4              | - | -   |
| Resorcinol C17:1<br>(isomer)                                              | -     | 2.6              | - | 0.2 |
| Anacardic acid C15:1                                                      | -     | 0.1              | - | -   |
| Resorcinol C19:1                                                          | -     | 0.1              | - | -   |
| Anacardic acid C17:1 (isomer)                                             | -     | 0.5              | - | -   |
| Anacardic acid C17:1 (isomer)                                             | -     | 0.4              | - | -   |
| Anacardic acid C17:1 (isomer)                                             | -     | 1.8              | - | 0.3 |
| Chlorogenic acid                                                          | -     | 7.6              | - | -   |
| Feruloyl-quinic acid                                                      | -     | Tr. <sup>c</sup> | - | -   |

|                                 |     |     |     |     |
|---------------------------------|-----|-----|-----|-----|
| 4-Caffeoyl-quinic acid          | -   | Tr. | -   | -   |
| 5-Caffeoyl-quinic acid          | -   | Tr. | -   | -   |
| Lanosterol                      | -   | 0.8 | -   | 1.7 |
| Lanosterol (3-epi)              | -   | -   | 0.8 | -   |
| Beta-sitosterol                 | -   | 0.2 | -   | -   |
| $\beta$ -Amyrine                | 0.2 | 6.0 | 6.5 | 6.8 |
| Cycloartenol                    | -   | 3.0 | 1.2 | 0.9 |
| $\alpha$ -Amyrine               | 0.2 | 6.9 | 3.1 | 4.7 |
| Lupeol                          | 0.3 | 6.8 | 5.2 | 6.1 |
| $\beta$ -Amyrenone              | -   | 3.0 | -   | 1.3 |
| Triterpenic acid                | -   | -   | 0.8 | -   |
| Oleanolic acid                  | -   | -   | -   | 0.8 |
| $\alpha$ -Amyrenone             | -   | 3.2 | -   | 1.4 |
| $\beta$ -Amyrine acetate        | -   | -   | 2.4 | -   |
| Lupenon                         | -   | 5.1 | -   | 1.5 |
| Dammarenone                     | -   | -   | -   | 1.5 |
| $\alpha$ -Amyrine acetate       | -   | 0.3 | 0.9 | -   |
| Ketoalcohol betulin type        | -   | -   | 3.5 | -   |
| Triterpene acetate betulin type | -   | 0.6 | -   | -   |
| Mangiferolic acid               | -   | 1.4 | -   | -   |

<sup>a</sup> The total ion current generated depends on the characteristics of the compound concerned and is not a true quantitation <sup>b</sup> Not found; <sup>c</sup> Traces (< 0.1)
