# Supplementary figures and images for: A Preliminary Study of Chemical Profiles of Honey, Cerumen, and Propolis of the African Stingless Bee Meliponula ferruginea
Source: MDPI journal article supplement (doi:10.3390/foods10050997), 2021-05-02

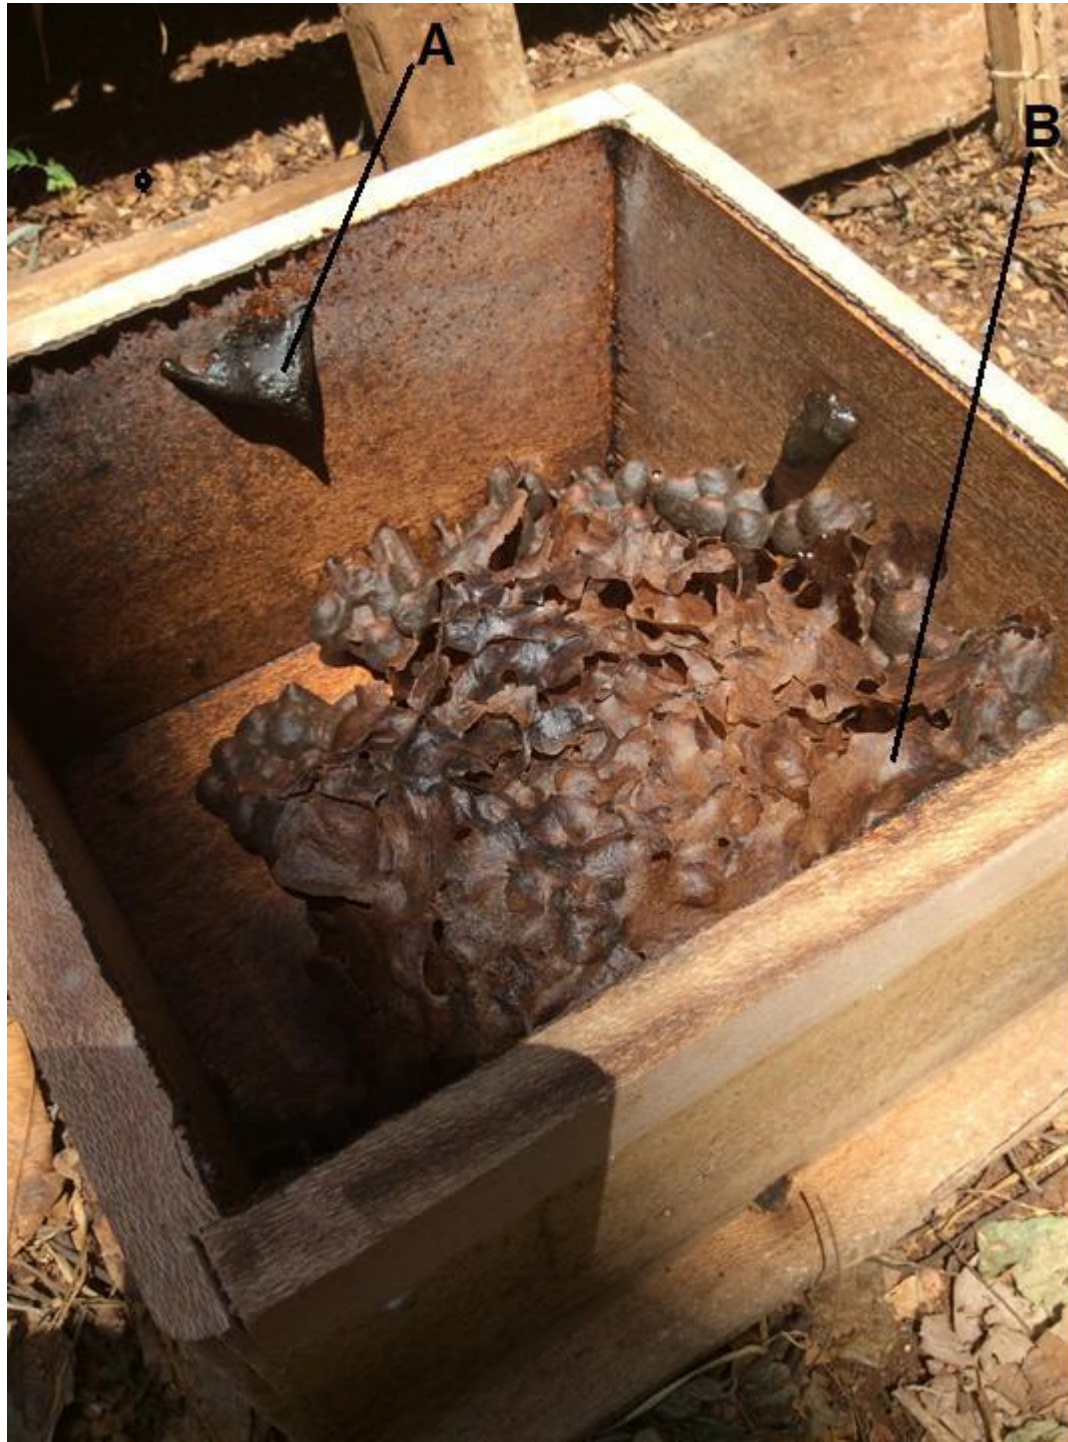

**Fig.S1.** Hive of *M. ferruginea*. **A** – propolis (resin load), **B** – cerumen (Photo: Kerry Clark)

Supplement: s1 [file s1]
